# Supplementary material for: The SRCAP chromatin remodeling complex promotes oxidative metabolism during prenatal heart development
Source: Oxford University Press journal article supplement (doi:10.1242/dev.199026), 2021-03-25
Supplement: dev199026supp.pdf [file dev199026supp.pdf]

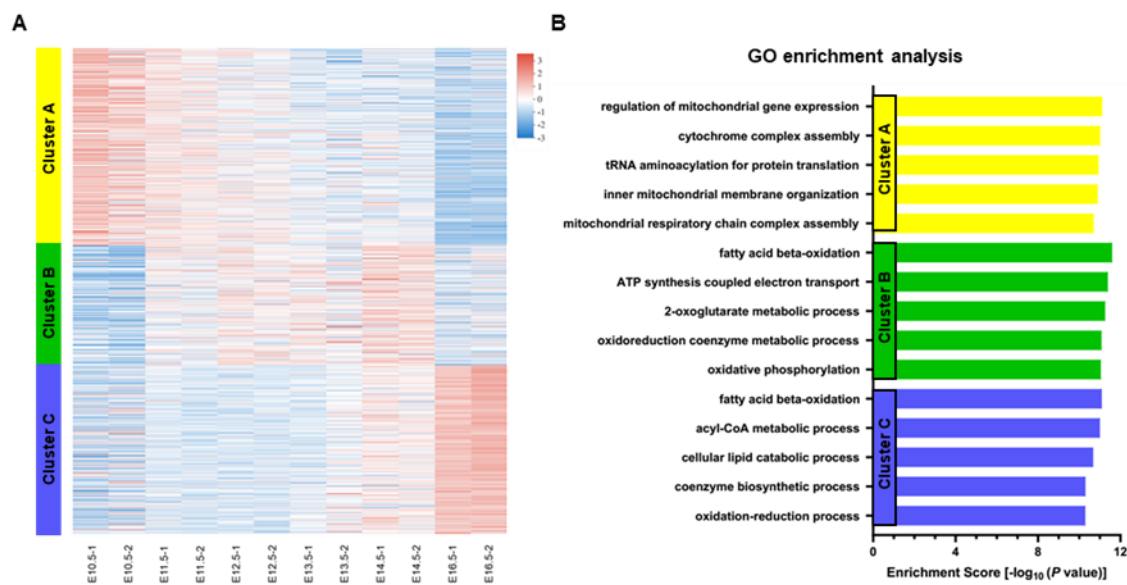

**Fig. S1. Analysis of mitochondrial genes during heart development. (A)** Heatmap. Three clusters of genes with distinct temporal expression patterns were categorized. **(B)** GO enrichment analysis.

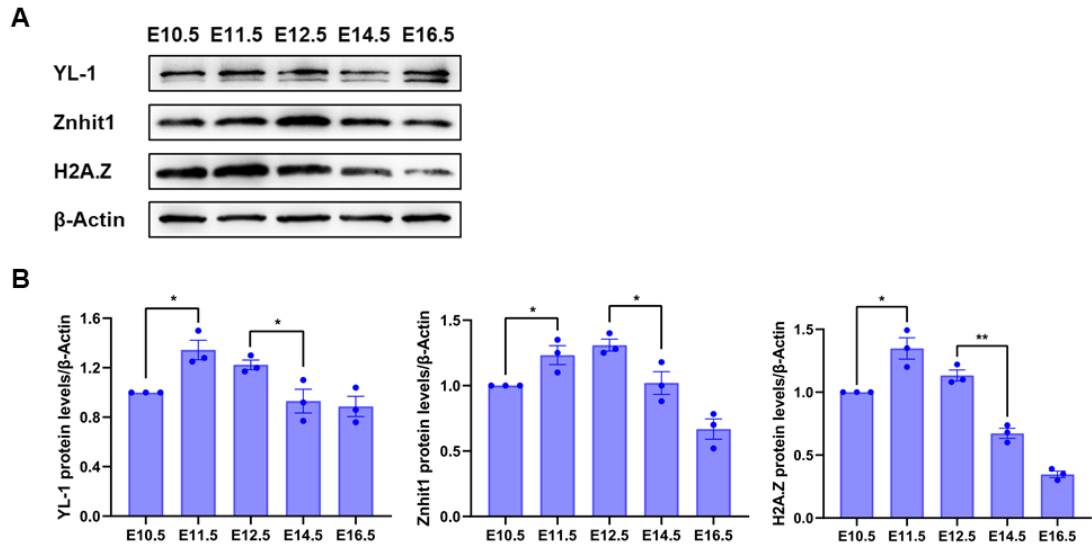

**Fig. S2. The temporal expression pattern of the core subunits of SRCAP complex.** (A) Western blotting analysis. (B) Quantification of (A). Experiments were repeated independently for three times, which produced similar results. Data are mean  $\pm$  s.e.m. Student's t test: \* $P < 0.05$ , \*\* $P < 0.01$ .

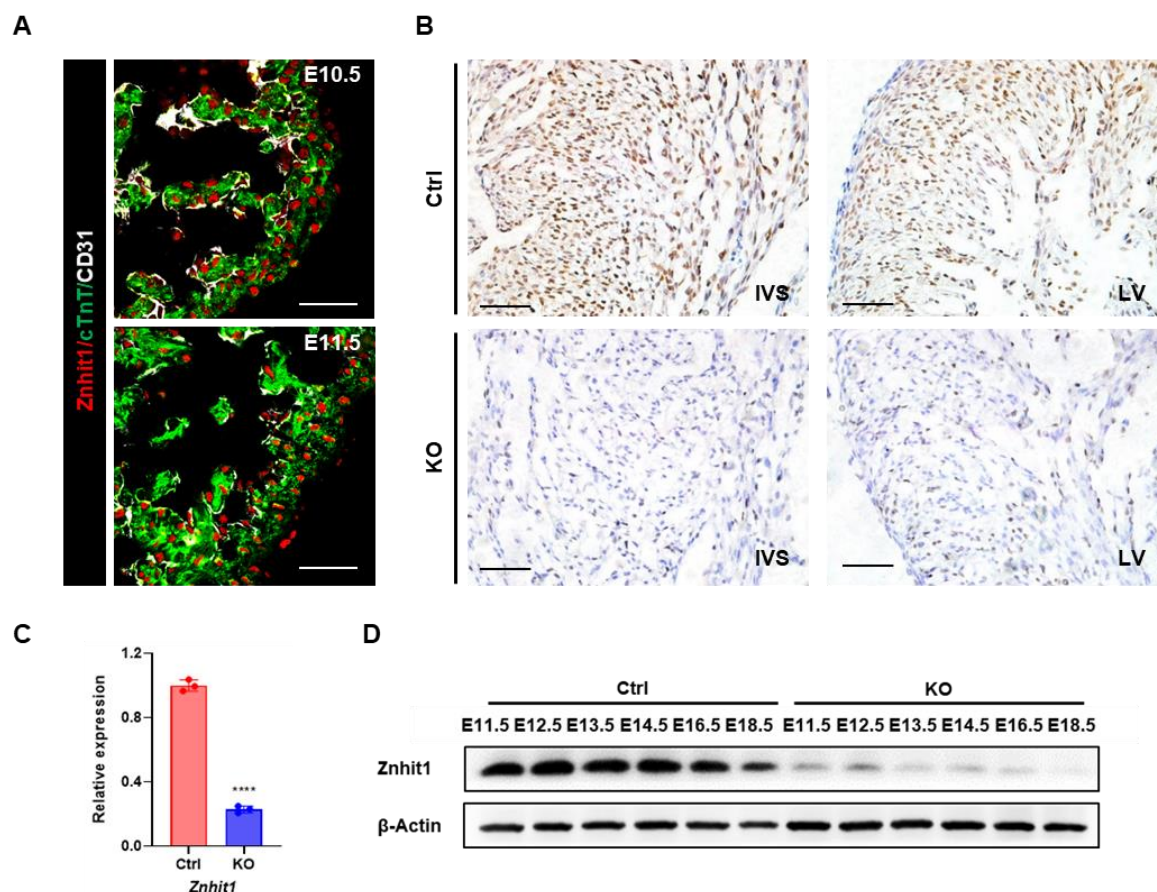

**Fig. S3. Verification of *Znhit1* deletion in the heart tissues.** (A) Immuno-fluorescence staining. *Znhit1* was localized in the nuclei of cardiomyocytes at both E10.5 and E11.5. (B-D) Specific knock out *Znhit1* in cardiomyocytes by *Tnnt2*-Cre. (B) Immunohistochemical analysis of *Znhit1* in the heart. IVS, interventricular septum; LV, left ventricle. Scale bar=50 $\mu$ m. (C) qRT-PCR analysis of *Znhit1* expression in the heart at E11.5 with normalization to *Gapdh* levels. Data are mean  $\pm$  s.e.m. Student's t test: \*\*\*\* $P < 0.0001$ . (D) Western blot analysis of *Znhit1*.  $\beta$ -Actin serves as loading control. Ctrl was control heart and KO was *Znhit1* deletion heart (*Tnnt2*-Cre mediated deletion).

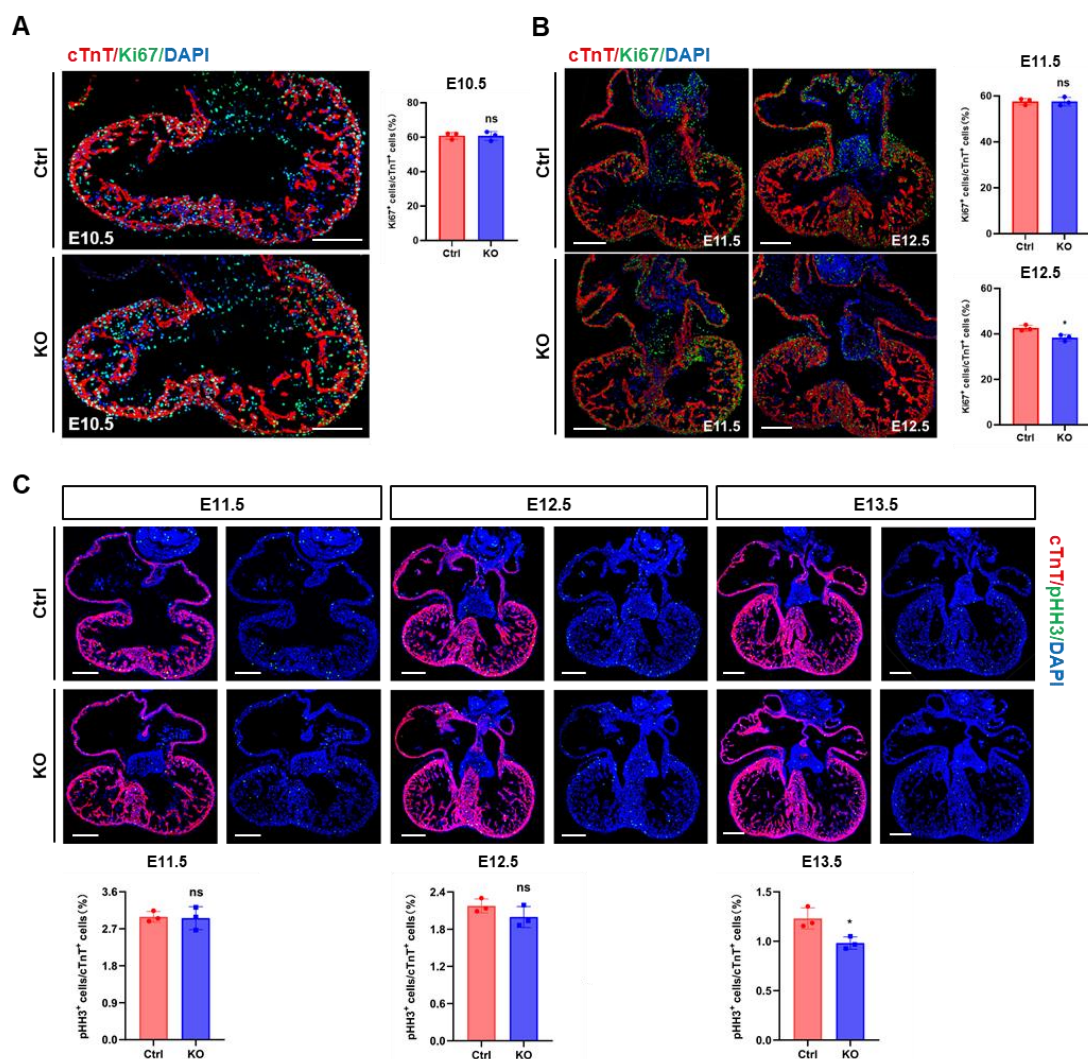

**Fig. S4. Decreased cell proliferation of cardiomyocytes in the heart of *Znhit1* deletion mice.** Ctrl was control heart and KO was *Znhit1* deletion heart (*Tnnt2*-Cre mediated deletion). (A and B) Ki67 immunostaining and quantification of proliferating cardiomyocytes (Ki67<sup>+</sup>cTnT<sup>+</sup> cells). (C) pHH3 immuno-staining and quantification of proliferating cardiomyocytes (pHH3<sup>+</sup>cTnT<sup>+</sup> cells). Data are mean  $\pm$  s.e.m. Student's t test: \* $P < 0.05$ . ns, not significant. Scale bar= 200 $\mu$ m.

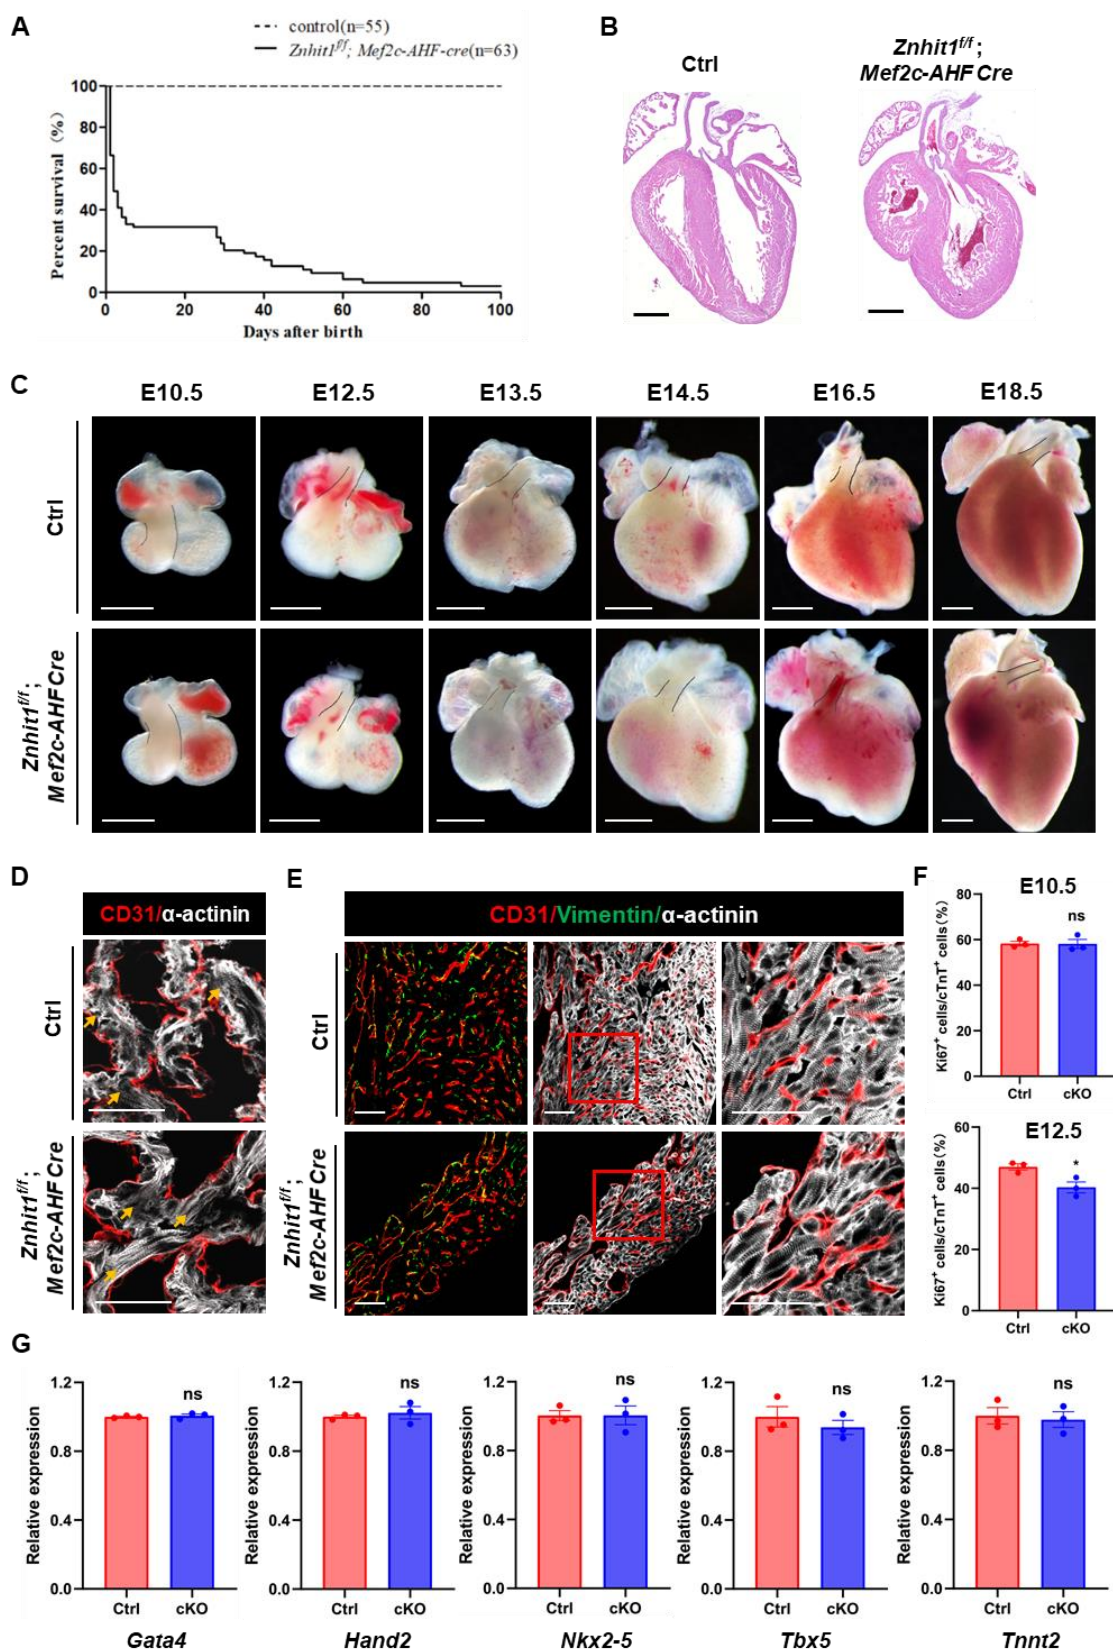

**Fig. S5. Disruption of the SRCAP complex did not affect the early development of AHF-progenitor cells. (A)** Survival curves. **(B)** H&E staining of P1 heart sections. Scale bars: 500 $\mu$ m. **(C)** Gross analysis of the hearts. Black lines depicted the outflow tract or pulmonary artery (PA). Slight PA stenosis was observed in the KO heart from

E13.5. Scale bars: 500 $\mu$ m. **(D and E)** Fluorescence staining of the right ventricle at E12.5 **(D)** and E18.5 **(E)**  $\alpha$ -actinin (in white) labeled sarcomere, and CD31 (in red) indicated endocardium and coronary endothelial cells. Yellow arrows pointed to the sarcomere in **(D)**. **(E)** The rightmost panels were higher magnification of the boxed area in the adjacent left panels. Scale bars: 50 $\mu$ m. No big difference was found between the mice of the two groups. **(F)** Quantification of proliferating cardiomyocytes. **(G)** Quantitative analysis of mRNA expression level in the right ventricle at E11.5. Data are mean  $\pm$  s.e.m. Student's t test: \* $P < 0.05$ . ns, not significant.

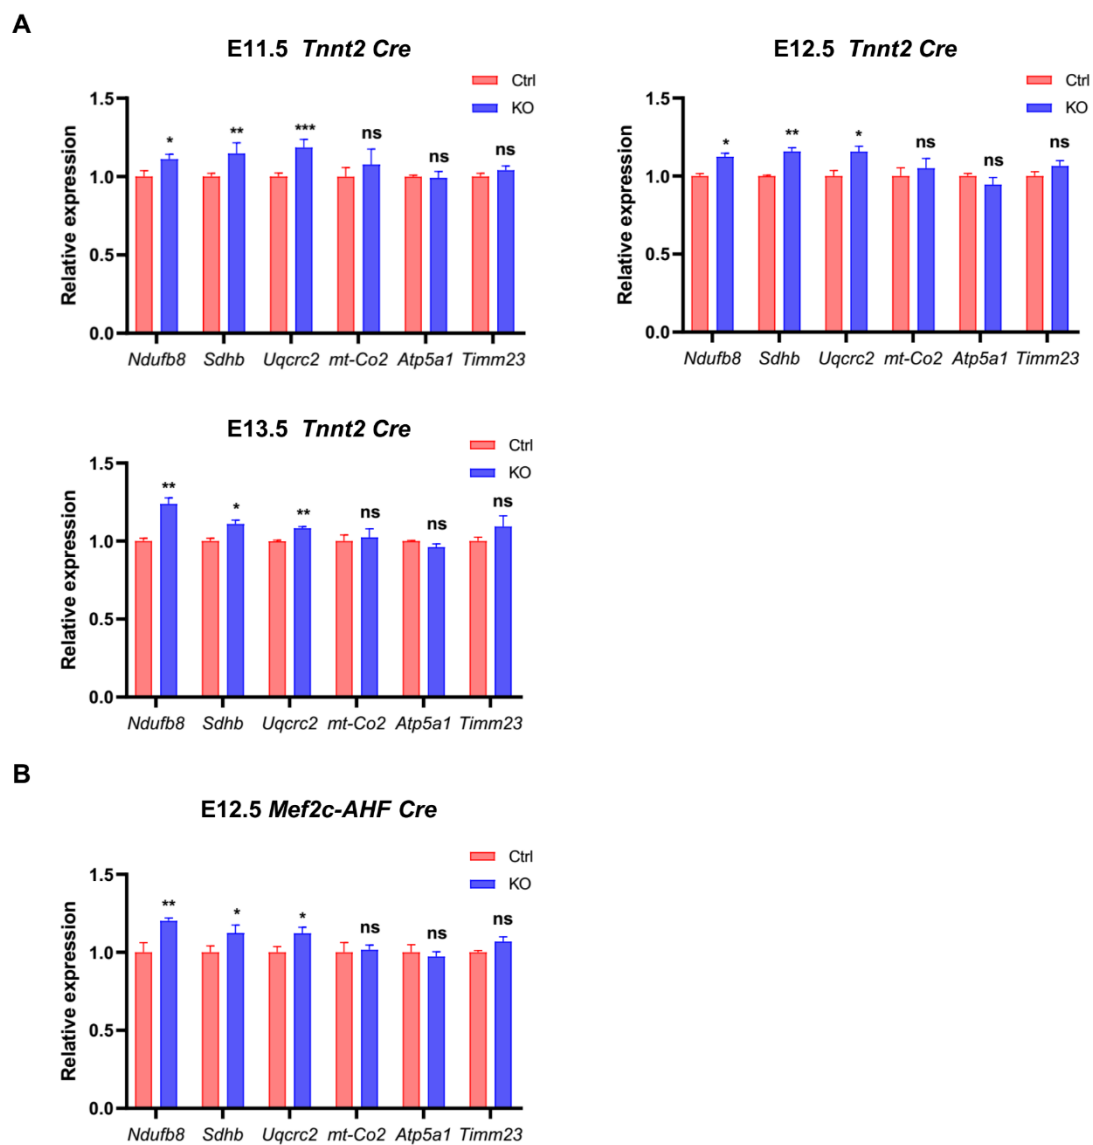

**Fig. S6. Analysis of mRNA levels by qRT-PCR in the heart tissues. (A)** qRT-PCR analysis of E11.5, E12.5 and E13.5 hearts. **(B)** qRT-PCR analysis of E12.5 right ventricles. Data are mean  $\pm$  s.e.m. Two-way ANOVA: \* $P < 0.05$ , \*\* $P < 0.01$ , \*\*\* $P < 0.001$ . ns, not significant.

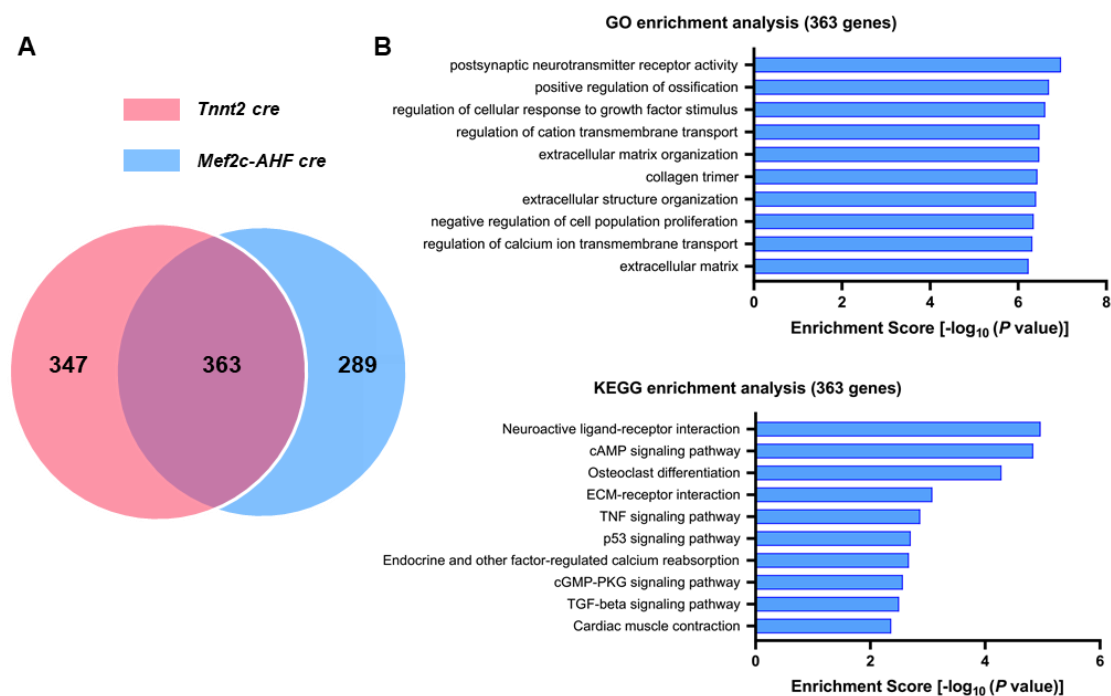

**Fig. S7. Analysis of the up-regulated genes in the *Znhit1* mutant mice. (A)** Venn diagram depicting the overlapping of the up-regulated genes in *Tnnt2* Cre (in red) and *Mef2c-AHF* Cre (in blue) mediated *Znhit1* deletion mice. **(B)** GO and KEGG enrichment analysis of the 363 overlapping genes in (A).



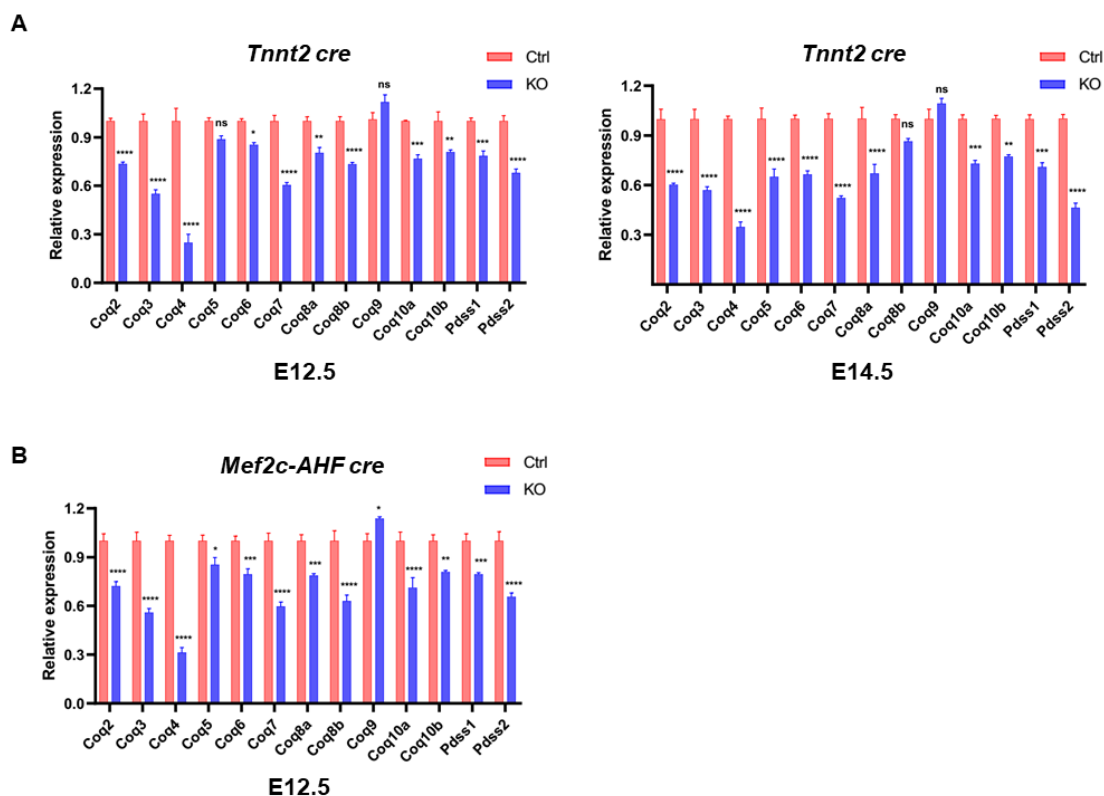

**Fig. S8. 12 genes out of the 13 genes required for biosynthesis of CoQ showed markedly reduced expression level in *Znhit1* mutant mice. (A)** qRT-PCR analysis of E12.5 and E14.5 hearts. **(B)** qRT-PCR analysis of E12.5 right ventricles. Data are mean  $\pm$  s.e.m. Two-way ANOVA: \* $P < 0.05$ , \*\* $P < 0.01$ , \*\*\* $P < 0.001$ , \*\*\*\* $P < 0.0001$ . ns, not significant.

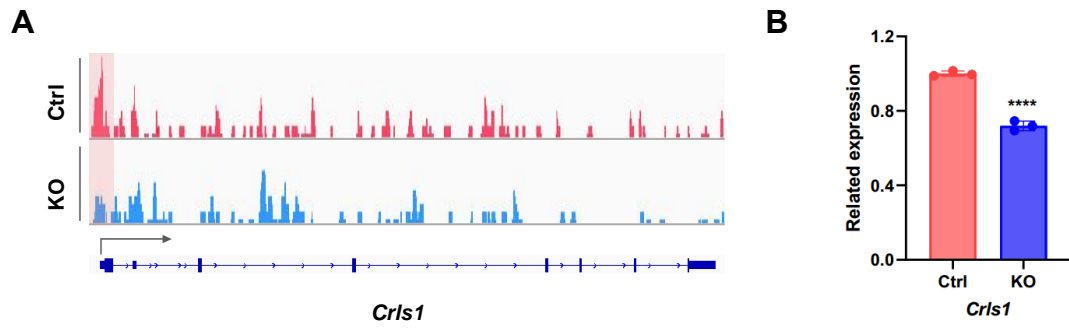

**Fig. S9. *Crls1* was a direct regulatory target of the SRCAP complex.** (A) CUT & Tag assay of H2A.Z-enriched regions in the heart at E13.5. The peak at the promoter region of *Crls1* was reduced in the KO. (B) qRT-PCR examination of *Crls1* expression level at E13.5. Data are mean  $\pm$  s.e.m. Student's t test: \*\*\*\* $P < 0.0001$ .

**Table S1. Primary antibodies**

| Antibodies                     | Applications | Dilution | Species | Source      | Catalog number |
|--------------------------------|--------------|----------|---------|-------------|----------------|
| Ndufb8                         | WB           | 1:1000   | Rabblt  | Proteintech | 14794-1-AP     |
| SDHB                           | WB           | 1:1000   | Rabblt  | abcam       | ab178423       |
| Uqcrc2                         | WB           | 1:1000   | Rabblt  | Proteintech | 14742-1-AP     |
| COXII                          | WB           | 1:2000   | Rabblt  | Proteintech | 55070-1-AP     |
| COXIV                          | WB           | 1:10000  | Rabblt  | Proteintech | 11242-1-AP     |
| Atp5A                          | WB           | 1:1000   | Rabblt  | Proteintech | 14676-1-AP     |
| Tim23                          | WB           | 1:2000   | Mouse   | BD          | 611223         |
| AMPK $\alpha$                  | WB           | 1:1000   | Rabblt  | CST         | #2532          |
| Phospho-AMPK $\alpha$ (Thr172) | WB           | 1:1000   | Rabblt  | CST         | #2535          |
| $\beta$ -Actin                 | WB           | 1:10000  | Mouse   | Bioworld    | BS6007M        |
| YL-1                           | WB           | 1:1000   | Rabblt  | Proteintech | 15143-1-AP     |
| Histone H2A.Z                  | WB           | 1:1000   | Rabblt  | abcam       | ab4174         |
| Histone H2A.Z                  | WB           | 1:1000   | Rabblt  | abcam       | ab150402       |
| Znhit1                         | WB           | 1:1000   | Rabblt  | abcam       | ab238125       |
| ZNHIT1                         | WB           | 1:1000   | Rabblt  | Proteintech | 16595-1-AP     |
| Coq3                           | WB           | 1:1000   | Rabblt  | Proteintech | 28051-1-AP     |
| Coq4                           | WB           | 1:1000   | Rabblt  | Proteintech | 16654-1-AP     |
| Ogdhl                          | WB           | 1:1000   | Rabblt  | Proteintech | 17110-1-AP     |
| Echs1                          | WB           | 1:1000   | Rabblt  | Proteintech | 11305-1-AP     |
| Cpt2                           | WB           | 1:1000   | Rabblt  | Proteintech | 26555-1-AP     |
| Cardiac Troponin T             | IF           | 1:500    | Mouse   | Life        | MA5-12960      |
| Vimentin                       | IF           | 1:200    | Rabbit  | Santa Cruz  | sc-5565        |
| CD31                           | IF           | 1:200    | Rat     | BD          | 550274         |
| $\alpha$ -Actinin              | IF           | 1:200    | Mouse   | Sigma       | A7811          |
| Ki67                           | IF           | 1:2000   | Rabbit  | abcam       | ab15580        |
| Phospho-Histone H3             | IF           | 1:200    | Rabbit  | CST         | #9701          |

**Table S2. Primers for qRT-PCR.**

| <b>Genes</b>  | <b>Primer sequence (5' to 3')</b>                      | <b>Genes</b>  | <b>Primer sequence (5' to 3')</b>                       |
|---------------|--------------------------------------------------------|---------------|---------------------------------------------------------|
| <i>Znhit1</i> | F: CAGACGGCGAGACAAGTTC<br>R: CAAACTGAGGTAGCCTCTTGC     | <i>Cpt2</i>   | F: CAGCACAGCATCGTACCCA<br>R: TCCCAATGCCGTTCTCAAAAT      |
| <i>Gata4</i>  | F: CCCTACCCAGCCTACATGG<br>R: ACATATCGAGATTGGGGTGTCT    | <i>Echs1</i>  | F: TTGTGAACTTGCCATGATGTGT<br>R: TGCTCGGGTGAGTCTCTGAG    |
| <i>Hand2</i>  | F: GAGAACCCTACTTCCACGG<br>R: GACAGGGCCATACTGTAGTCG     | <i>Ogdhl</i>  | F: AGCGGAGTCAGCTCCAGTTAT<br>R: GGATCTGGTAGGCCCGGAT      |
| <i>Tbx5</i>   | F: ATGGCCGATACAGATGAGGG<br>R: TTCGTGGAACCTCAGCCACAG    | <i>Coq2</i>   | F: ACAAGCCCATAGGAACCTGG<br>R: CTCCACGCATCAGAATAGCTC     |
| <i>Nkx2-5</i> | F: GACAAAGCCGAGACGGATGG<br>R: CTGTCGCTTGCACTTGTAGC     | <i>Coq3</i>   | F: CTCGTGGGGTTCGTCTCCT<br>R: GAGCTGCGTCCCTGAGTAAG       |
| <i>Tnnt2</i>  | F: TCTTCTGGTGCTACTCGAAGC<br>R: CTCCATCGGGGATCTTGGGT    | <i>Coq4</i>   | F: TGTACCCGGACCACATCCC<br>R: AACCATGTCTGGCGATAGG        |
| <i>Mef2c</i>  | F: ATCCCGATGCAGACGATTCAG<br>R: AACAGCACACAATCTTTGCCT   | <i>Coq5</i>   | F: CCCAGGTGCTGCGTTCTATG<br>R: GTCTCAAACCCGAAGTGCG       |
| <i>Acta2</i>  | F: GTCCCAGACATCAGGGAGTAA<br>R: TCGGATACTTCAGCGTCAGGA   | <i>Coq6</i>   | F: CTCAGCAGTTTTGGTGCATGG<br>R: TGTCCCTGTCTGAACATTATCAAG |
| <i>Ndufb8</i> | F: TGTTGCCGGGGTCATATCCTA<br>R: AGCATCGGGTAGTCGCCATA    | <i>Coq7</i>   | F: CTCATCATCAGGTGTCACAGTTC<br>R: GGTTTGCTCCATATTCACCAGC |
| <i>Sdhb</i>   | F: AATTTGCCATTTACCGATGGGA<br>R: AGCATCCAACACCATAGGTCC  | <i>Coq8a</i>  | F: GCAGAGCGCATTGTGAGTACA<br>R: GCCAGGTGAGGGTTGATGAAG    |
| <i>Uqcrc2</i> | F: AAAGTTGCCCCGAAGGTAAA<br>R: GAGCATAGTTTTCCAGAGAAGCA  | <i>Coq8b</i>  | F: GAGAGGATCGTGCAGACCTTA<br>R: TAAAGTCGGCACTCTGTCCGA    |
| <i>mt-Co2</i> | F: AACCATAGGGCACCAATGATAC<br>R: GGATGGCATCAGTTTTAAGTCC | <i>Coq9</i>   | F: GTGGGGTTCCGGTCTTCAG<br>R: GGGGTGGACGGGAAAATC         |
| <i>Atp5a1</i> | F: TCTCCATGCCTCTAACACTCG<br>R: CCAGGTCAACAGACGTGTCAG   | <i>Coq10a</i> | F: CCAACGTCCAGGAGTACCG<br>R: GGTGGAAACCCAACCTCCAAT      |
| <i>Timm23</i> | F: GAAGGTGGCGGAAGAAGTAGC<br>R: GGGGGTTCATACCAGTCAGC    | <i>Coq10b</i> | F: GGAGACTATTTGGCGTTTTAGCC<br>R: AAGAACAGAGTAGCGAGCTGA  |
| <i>Gapdh</i>  | F: AACTTTGGCATTGTGGAAGG<br>R: ACACATTGGGGGTAGGAACA     | <i>Pdss1</i>  | F: ACACCAGCAATGTGCAGTTG<br>R: ACAGACCTTTCAAGTCTCTCCAG   |
| <i>Actb</i>   | F: GGCTGTATTCCCCTCCATCG<br>R: CCAGTTGGTAACAATGCCATGT   | <i>Pdss2</i>  | F: CGCTTGTCGGTTACCTCG<br>R: GGGTAGCCCACGATCTTCTC        |
